# Supplementary material
Source: PubMed Central journal article supplement (PMC5621882)
Supplement: jciinsight-2-94379-s001.pdf [file jciinsight-2-94379-s001.pdf]

**Supplementary Table 1.** Oligonucleotide primer list.

| Primer Name   | RefSeq Accession No. | Sequence (5' to 3')        |
|---------------|----------------------|----------------------------|
| ATF4          | NM_182810.2          | CTCCAGCGACAAGGCTAAGG       |
|               |                      | CATTTTCTCCAACATCCAATCTGT   |
| CD36          | NM_001001547.2       | CAAAATCTTCTATGTTCCAAGTCAGA |
|               |                      | CCATCTGCAGTATTGTTGTAAGGATA |
| CHOP          | NM_001195053.1       | GAGAGAGTGTTCAGAAGGAAGTGT   |
|               |                      | CCGAAGGAGAAAGGCAATGA       |
| ERO-1         | NM_019891.3          | TGTTTCAAGCCTCGATCTGTTTAT   |
|               |                      | AGACACAAACCTTCTAGCCATGTG   |
| HIF1 $\alpha$ | NM_001530.3          | TGTGTGAATTACGTTGTGAGTGGTAT |
|               |                      | CCGGTTTAAGGACACATTCTGTT    |
| 18S rRNA      | M10098.1             | CGAACGTCTGCCCTATCAACTT     |
|               |                      | ACCCGTGGTCACCATGGTA        |

| BIORAD Primer Name    | Unique Assay ID | Amplicon Context Sequence                                                                                                                                                                                    |
|-----------------------|-----------------|--------------------------------------------------------------------------------------------------------------------------------------------------------------------------------------------------------------|
| RPS18                 | qHsaCED0037454  | GTGGAACGTGTGATCACCATTATGCAGA<br>ATCCACGCCAGTACAAGATCCCAGACTG<br>GTTCTTGAACAGACAGAAGGATGTAAAG<br>GATGGAAAATACA                                                                                                |
| CD68                  | qHsaCED0007025  | GTTTCTCCTGCCCCAGTGACCGGTCCATC<br>TTGCTGCCTCTCATCATCGGCCTGATCCT<br>TCTTGGCCTCCTCGCCCTGGTGCTTATTG<br>CTTTCTGCATCATCCGGAGACGCC                                                                                  |
| IL-6                  | qHsaCID0020314  | TGAAAAAGATGGATGCTTCCAATCTGGA<br>TTCAATGAGGAGACTTGCTGGTAAAT<br>CATCACTGGTCTTTTGGAGTTTGAGGTAT<br>ACCTAGAGTACCTCCAGAACAGATTTGA<br>GAGTAGTGAGGAACAAGCCAGAGCTGTG<br>CAGATGAGTA                                    |
| MCP-1                 | qHsaCID0011608  | ACTGAAGCTCGCACTCTCGCCTCCAGCAT<br>GAAAGTCTCTGCCGCCCTTCTGTGCCTGC<br>TGCTCATAGCAGCCACCTTCATTCCCCAA<br>GGGCTCGCTCAGCCAGATGCAATCAATG<br>CCCCAGTCACCTGCTGTTATAACTTCACC<br>AATAGGAAGATCTCAGTGCAGAGGCTCG<br>CGAGCTAT |
| NLRP3                 | qHsaCID0036694  | GCGATCAACAGGAGAGACCTTTATGAGA<br>AAGCAAAAAGAGATGAGCCGAAGTGGG<br>GTTTCAGATAATGCACGTGTTTCGAATCCC<br>ACTGTGATATGCCAGGAAGACAGCATTG<br>AAGAGGAGTGGATGGGTTTACTGGAGTA<br>CCTTTCGAGA                                  |
| PDGFB (PDGF $\beta$ ) | qHsaCID0016004  | AGCTCGCCTCCAGAGTGGGAGCGGGTCA<br>TGTTTCAGGTCCAACCTCGGCCCATCTTCC<br>TCTCCGGGGTCTCCGTGCAGCAGGCGTT<br>GGAGATCATCAAAGGAGCGGATCGAGTG<br>GTC                                                                        |
| TLR4                  | qHsaCED0037607  | CAAGATTCAAAGTATTTATTGCACAGAC<br>TTGCGGGTTCTACATCAAATGCCCTACT                                                                                                                                                 |

|                        |                |                                                                                                                                                                      |
|------------------------|----------------|----------------------------------------------------------------------------------------------------------------------------------------------------------------------|
|                        |                | CAATCTCTCTTTAGACCTGTCCCTGAACC<br>CTATGAACTTTATCCAACCAGGTGCATTT<br>AAAGA                                                                                              |
| VEGFA (VEGF $\alpha$ ) | qHsaCED0006937 | TGGTGAAGTTCATGGATGTCTATCAGCG<br>CAGCTACTGCCATCCAATCGAGACCCTG<br>GTGGACATCTTCCAGGAGTACCCTGATG<br>AGATCGAGTACATCTTCAAGCCATCCTGT<br>GTGCCCCTGATGCGATGCGGGGGCTGCT<br>GCA |
| SLC2A1 (GLUT-1)        | qHsaCID0022232 | ATGTCTGGTTGTAGAACTCCTCGATCACC<br>TTCTGGGGGGCATTGATGACTCCAG<br>TGTTGTAGCCAAACTGCAGGGAGCCAAG<br>CACTGCTC                                                               |

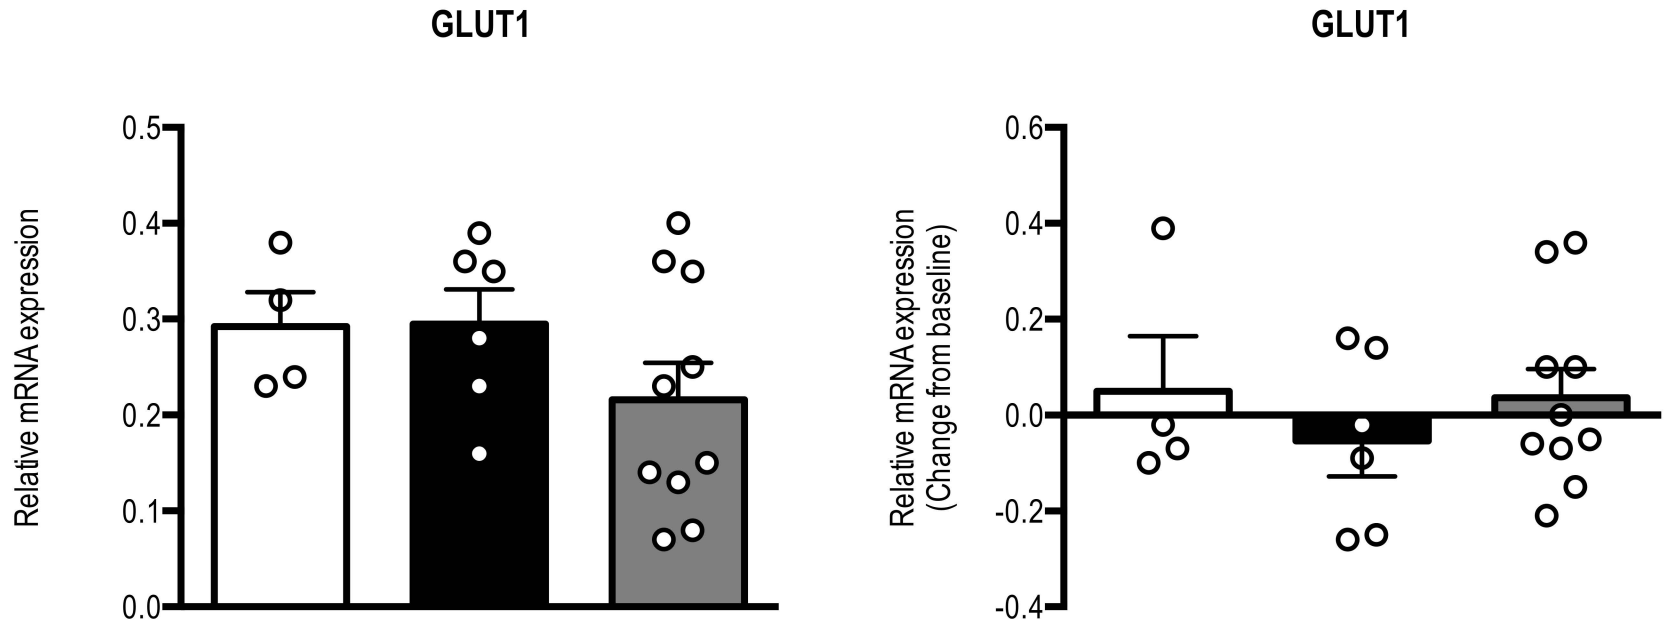

Supplementary Figure 1. mRNA levels of GLUT1 in subcutaneous adipose tissue from non-OSA, OSA therapeutic c-PAP and OSA sub-therapeutic c-PAP obese subjects at baseline and after 24 weeks of c-PAP treatment. Subcutaneous adipose tissue biopsies were obtained from non-OSA (white bars), OSA therapeutic c-PAP (black bars) and OSA sub-therapeutic c-PAP (grey bars) obese subjects at baseline (panel A) and after 24 weeks of treatment (panel B). Total RNA was extracted, and mRNA levels of GLUT1 were determined by qRT-PCR and normalized to 18S rRNA. Results are mean  $\pm$  SE of values in adipose tissue (n=2 measurements for each subject; 4 non-OSA, 6 OSA therapeutic c-PAP and 10 OSA sub-therapeutic c-PAP). Differences between groups were assessed with one-way ANOVA statistical analysis.

**CD36**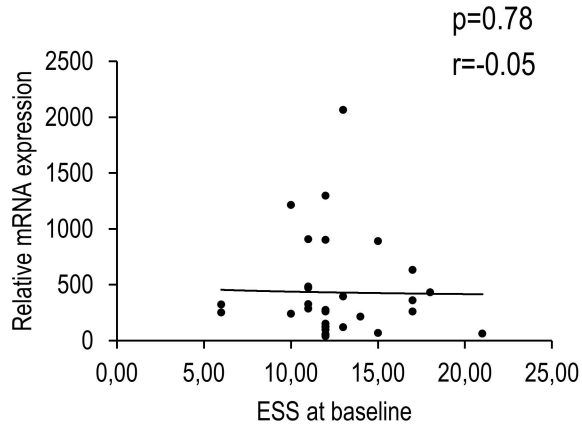**CD68**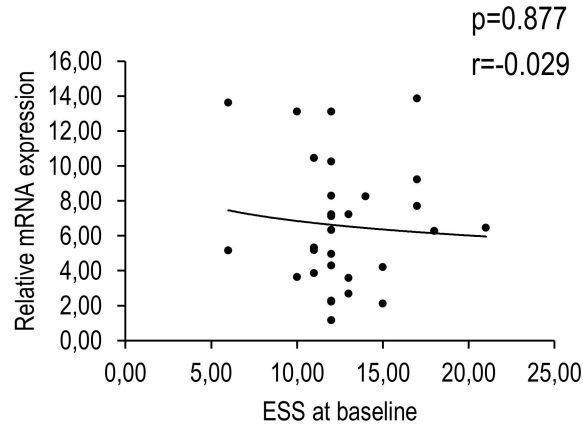**ERO-1**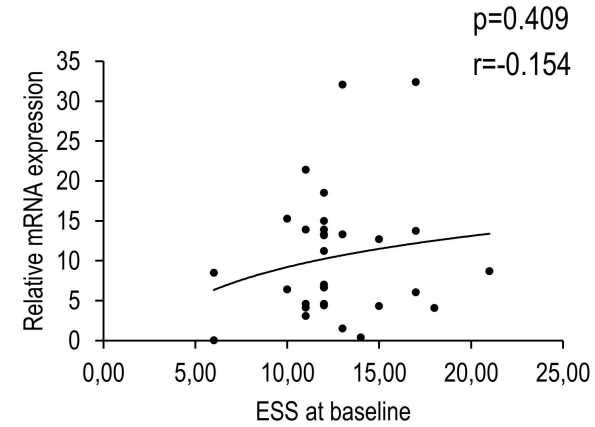**CD36**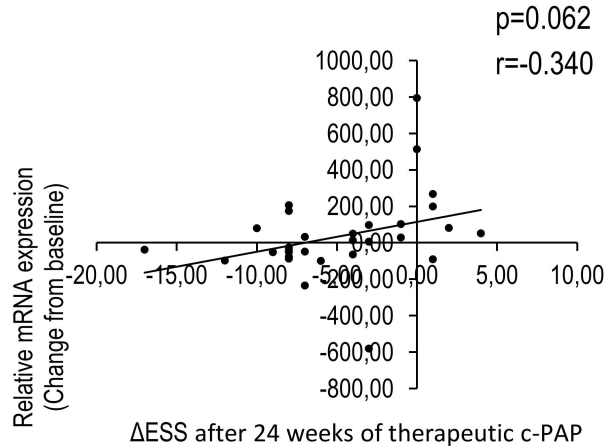**CD68**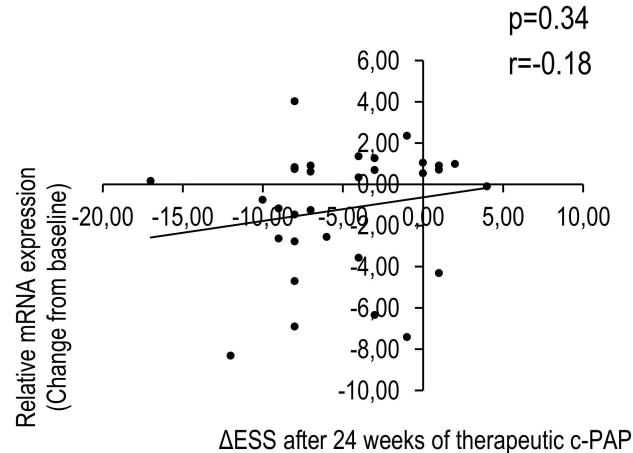**ERO-1**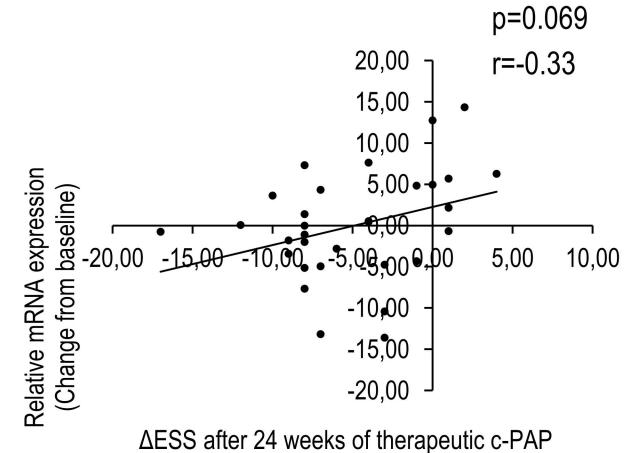

**Supplementary Figure 2. Relationship between ESS and adipose tissue inflammation at baseline and after c-PAP treatment. *Top panels:* correlation between ESS and mRNA levels of CD36, CD68 and ERO1 in OSA obese subjects at baseline (n=16 OSA therapeutic c-PAP subjects and n=15 OSA sub-therapeutic c-PAP subjects). *Bottom panels:* correlation between ESS and mRNA levels of CD36, CD68 and ERO1 in OSA obese subjects after c-PAP treatment (n=16 OSA therapeutic c-PAP subjects and n=15 OSA sub-therapeutic c-PAP subjects). Statistical analysis was performed using Pearson correlation.**
